# Supplementary material for: Extraction of Phenolic Compounds from Populus Salicaceae Bark
Source: MDPI journal article supplement (doi:10.3390/biom12040539), 2022-04-02
Supplement: s1 [file s1]

# **Supplementary Material**

## **Extraction of chemical compounds from poplar bark**

**Elsa Autor, Alfonso Cornejo\*, Fernando Bimbela\*, Maitane Maisterra, Luis M. Gandía and Víctor Martínez-Merino**

Institute for Advanced Materials and Mathematics (INAMAT<sup>2</sup>) and Department of Sciences,  
Universidad Pública de Navarra (UPNA), Campus de Arrosadía, 31006 Pamplona, Spain;

\* Correspondence: [alfonso.cornejo@unavarra.es](mailto:alfonso.cornejo@unavarra.es), [fernando.bimbela@unavarra.es](mailto:fernando.bimbela@unavarra.es)

## Supporting Information

### SI.1. Extraction methodology

Table S1. Physical properties of the selected solvents.

| Solvent         | Boling point (°C) | Dipole moment (Db) | Dielectric constant |
|-----------------|-------------------|--------------------|---------------------|
| Hexane          | 69                | 0                  | 2.02                |
| Dichloromethane | 40                | 1.60               | 9.08                |
| Ethyl acetate   | 78                | 1.78               | 6.02                |
| MeOH            | 65                | 1.70               | 33.00               |
| Water           | 100               | 1.85               | 78.20               |

### SI.2. Antioxidant activity

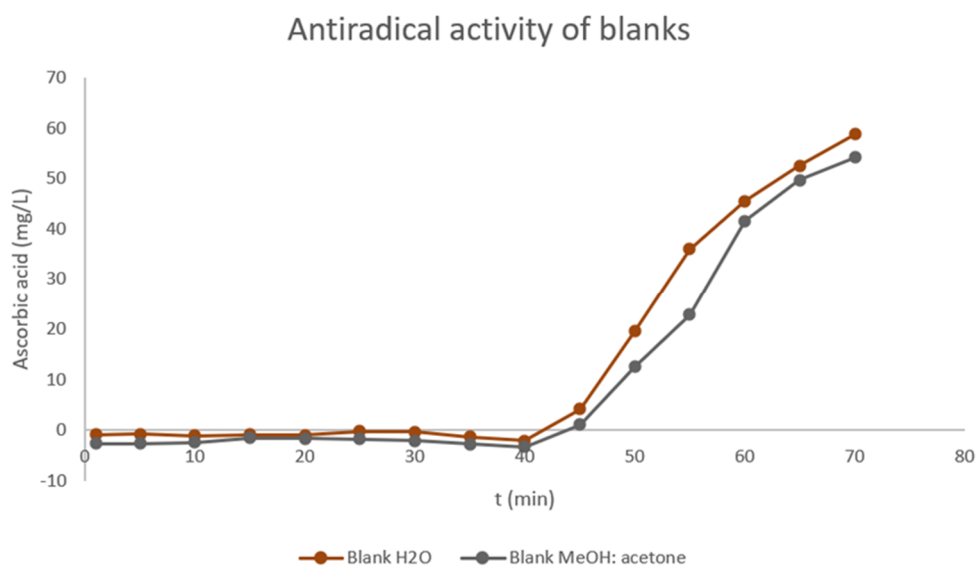

Figure S1. Antiradical activity in blank solutions

### SI.3 Fractionation of extracts

Table S2. Fractionation of H extracts

| Fraction | #fractions | Total volume/ mL | Eluent                      |
|----------|------------|------------------|-----------------------------|
| H1       | 13         | 95               | Hexanes : Ethyl acetate 1:1 |
| H2       | 3          | 22               | Ethyl acetate               |
| H3       | 5          | 37               | Ethyl acetate               |
| H4       | 5          | 37               | Ethyl acetate               |
| H5       | 4          | 29               | Ethyl acetate               |
| H6       | 4          | 29               | Ethyl acetate               |

Table S3. Fractionation of D extracts

| Fraction | #fractions | Total volume/ mL | Eluent                 | Mass/ mg   |
|----------|------------|------------------|------------------------|------------|
| D1       | 14         | 100              | DCM: Ethyl acetate 7:3 | 9.3        |
| D2       | 2          | 14               | DCM: Ethyl acetate 7:3 | 19.5       |
| D3       | 11         | 76               | DCM: Ethyl acetate 1:1 | 55.3       |
| D4       | 4          | 28               | DCM: Ethyl acetate 1:1 | 17.2       |
| D5       | 4          | 28               | DCM: Ethyl acetate 1:1 | 49.3       |
| D6       | 16         | 112              | DCM: Ethyl acetate 1:5 | 11.2       |
| D7       | 6          | 42               | Ethyl acetate          | 48.1       |
|          |            |                  | <b>Total</b>           | <b>209</b> |

Table S4. Fractionation of EA extracts

| Fraction | #fractions | Total volume/ mL | Eluent             | Mass/ mg    |
|----------|------------|------------------|--------------------|-------------|
| EA1      | 5          | 62               | DCM/MeOH 7:3       | 192         |
| EA2      | 4          | 50               | DCM/MeOH 1:3       | 1057        |
| EA3      | 4          | 50               | DCM/MeOH 1:3       | 551         |
| EA4      | 4          | 50               | DCM/MeOH 1:3       | 132         |
| EA5      | 6          | 75               | DCM/MeOH 1:3       | 54          |
| EA6      | 4          | 50               | DCM/MeOH 1:3       | 8           |
| EA7      | 3          | 38               | DCM/MeOH 1:3       | 3           |
| EA8      | 4          | 50               | DCM/MeOH 3;7; MeOH | 0           |
|          |            |                  | <b>Total</b>       | <b>1997</b> |

Table S5. Fractionation of M extracts

| <b>Fraction</b> | <b>#fractions</b> | <b>Total volume/<br/>mL</b> | <b>Eluent</b>       | <b>Mass/ mg</b> |
|-----------------|-------------------|-----------------------------|---------------------|-----------------|
| M1              | 16                | 132                         | DCM/ AcOEt          | 24              |
| M2              | 4                 | 33                          | DCM/EA 3:7 DCM/MeOH | 90              |
| M3              | 2                 | 16                          | DCM/MeOH 7:3        | 7               |
| M4              | 2                 | 16                          | DCM/MeOH 7:3        | 136             |
| M5              | 4                 | 33                          | DCM/MeOH 7:3        | 1749            |
| M6              | 8                 | 66                          | DCM/MeOH 7:3        | 3544            |
| M7              | 5                 | 41                          | DCM/MeOH 3:7        | 1346            |
| M8              | 4                 | 33                          | DCM/MeOH 3:7        | 259             |
| M9              | 3                 | 25                          | DCM/MeOH 3:7        | 84              |
| M10             | 4                 | 33                          | DCM/MeOH 3:7        | 149             |
| M11             | 1                 | 8                           | DCM/MeOH 3:7        | 26              |
| M12             | 18                | 214                         | MeOH and iPrOH      | 20              |
|                 |                   |                             | <b>Total</b>        | <b>7434</b>     |

Table S6. Fractionation of W extracts

| <b>Fraction</b> | <b>#fractions</b> | <b>Total volume/<br/>mL</b> | <b>Eluent</b> | <b>Mass/ mg</b> |
|-----------------|-------------------|-----------------------------|---------------|-----------------|
| W1              | 10                | 98                          | AcOEt         | 54.2            |
| W2              | 4                 | 39                          | AcOEt         | 38.6            |
| W3              | 2                 | 20                          | MeOH          | 35.7            |
| W4              | 5                 | 49                          | MeOH          | 70.2            |
| W5              | 1                 | 10                          | MeOH          | 8.6             |
| W6              | 4                 | 39                          | MeOH          | 31.3            |
| W7              | 1                 | 10                          | iPrOH         | 4.6             |
| W8              | 4                 | 39                          | iPrOH         | 5.1             |
|                 |                   |                             | <b>Total</b>  | <b>248</b>      |
